# Supplementary material for: A simple preparation of very high methanol tolerant cathode electrocatalyst for direct methanol fuel cell based on polymer-coated carbon nanotube/platinum
Source: PubMed Central journal article supplement (PMC4507447; doi:10.1038/srep12236), 2015-07-20
Supplement: srep12236-s1.pdf [file srep12236-s1.pdf]

## Supplementary Information

### A simple preparation of a very high methanol tolerance cathode electrocatalyst for direct methanol fuel cell based on polymer-coated carbon nanotube/platinum

Zehui Yang and Naotoshi Nakashima\*

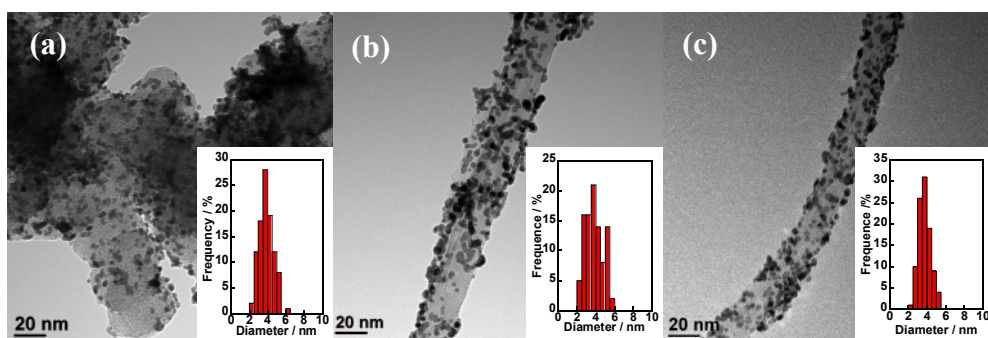

**Figure S1|** TEM images of the CB/Pt (a), MWNT/PyPBI/Pt (b) and MWNT/PyPBI/Pt/PVPA (c). Histograms of their particle size distribution (100 particles) are shown in the inset.

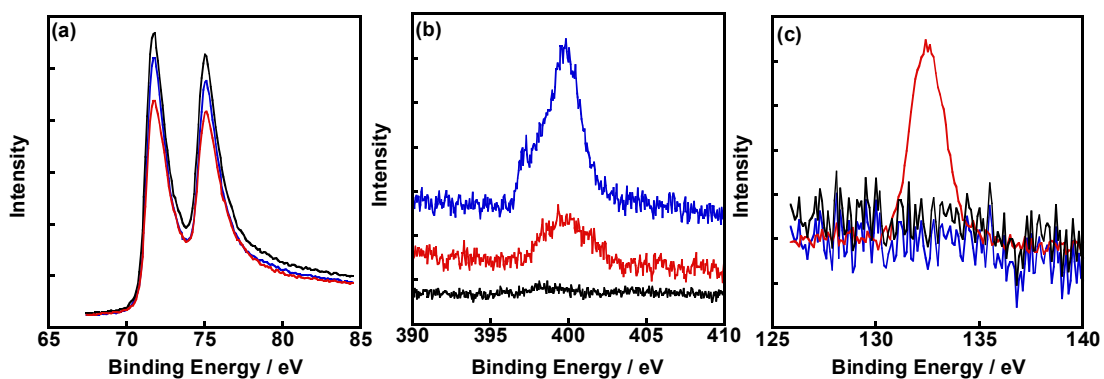

**Figure S2** | XPS narrow scans in the regions of Pt<sub>4f</sub> (a), N<sub>1s</sub> (b) and P<sub>2p</sub> (c) of the CB/Pt (black), MWNT/PyPBI/Pt (blue) and MWNT/PyPBI/Pt/PVPA (red).

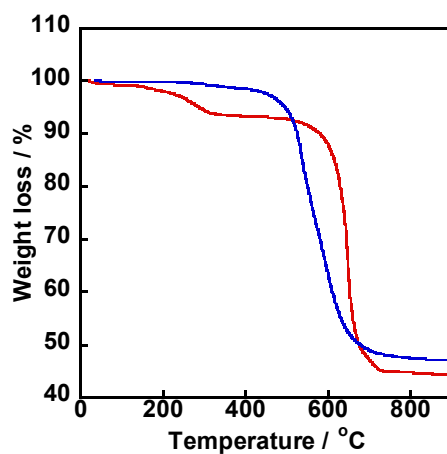

**Figure S3** | TGA curves of the MWNT/PyPBI/Pt (blue) and MWNT/PyPBI/Pt/PVPA (red).

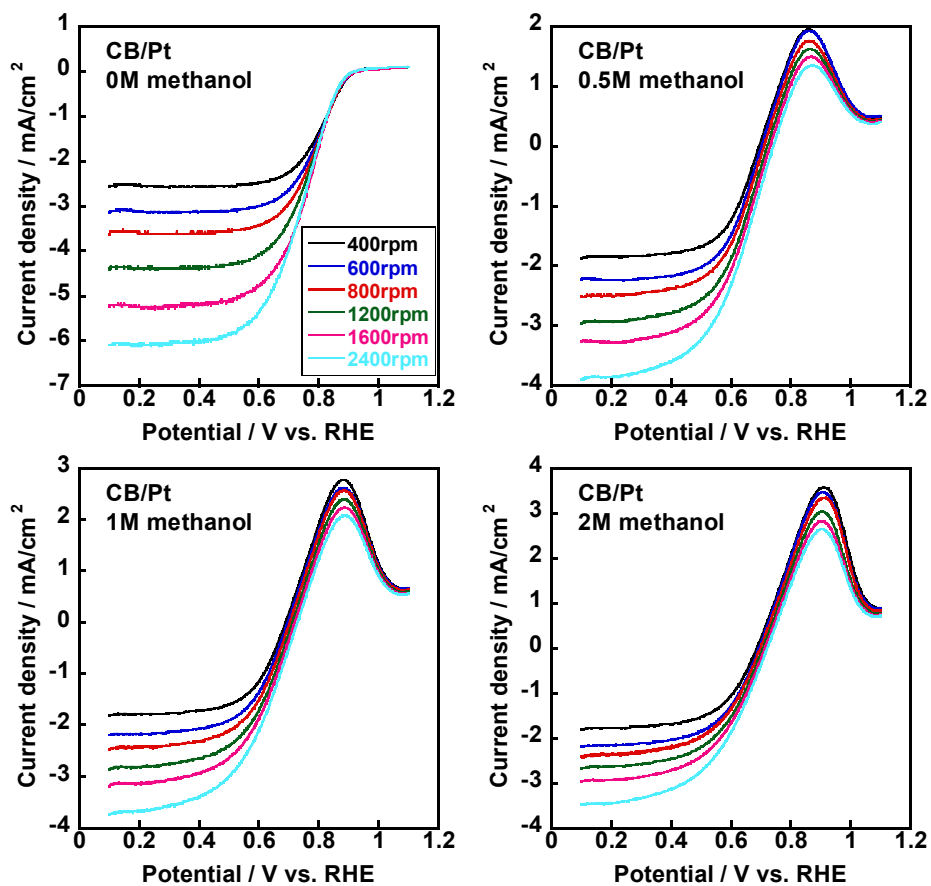

**Figure S4|** Rotating disc current density of the CB/Pt in O<sub>2</sub>-saturated 0.1M HClO<sub>4</sub> solutions containing a specified concentration of methanol at 25 °C.

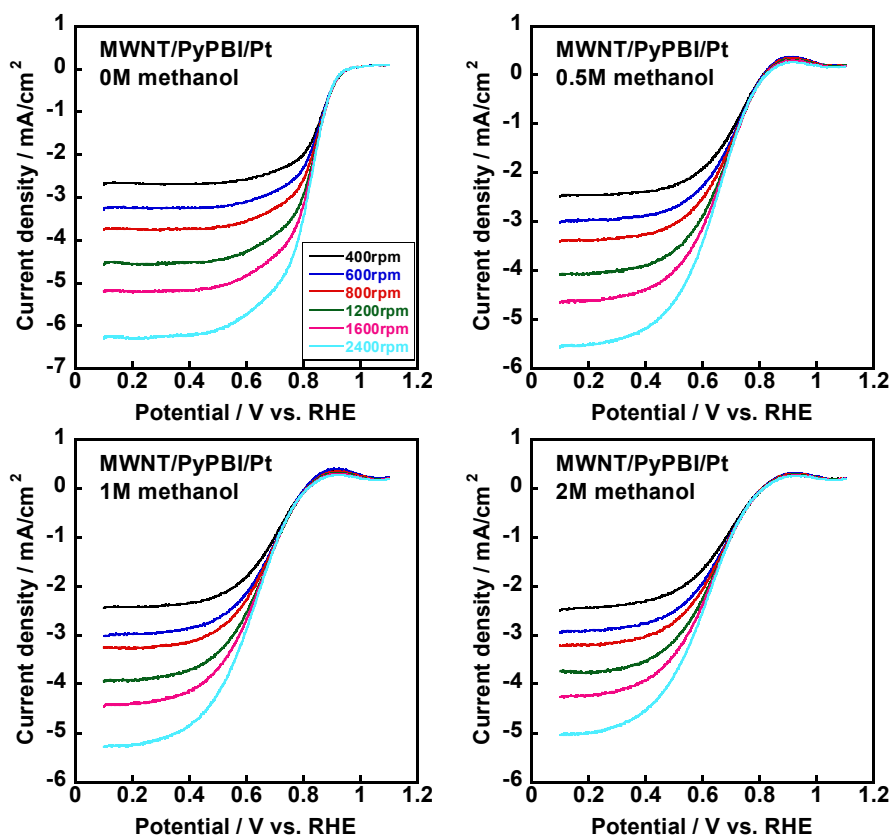

**Figure S5]** Rotating disc current density of the MWNT/PyPBI/Pt in O<sub>2</sub>-saturated 0.1M HClO<sub>4</sub> solutions in the presence of specified concentration of methanol at 25 °C.

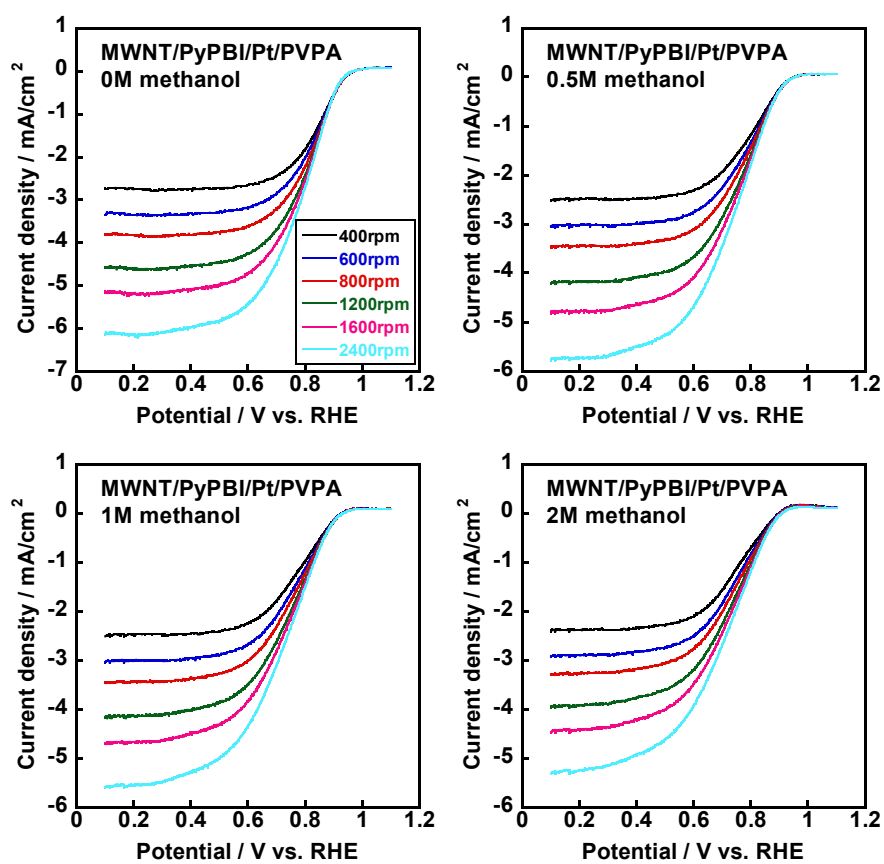

**Figure S6]** Rotating disc current density of MWNT/PyPBI/Pt/PVPA in O<sub>2</sub>-saturated 0.1M HClO<sub>4</sub> and in the presence of different concentration of methanol electrolyte at 25 °C.

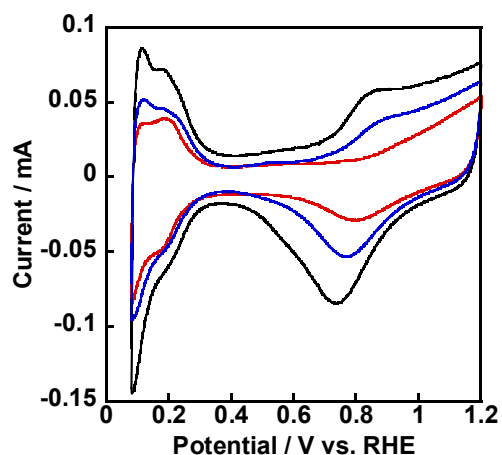

**Figure S7** | CV curves recorded in 0.1M HClO<sub>4</sub> solutions at the scan rate of 50 mV/s for the CB/Pt (black), MWNT/PyPBI/Pt (blue) and MWNT/PyPBI/Pt/PVPA (red).

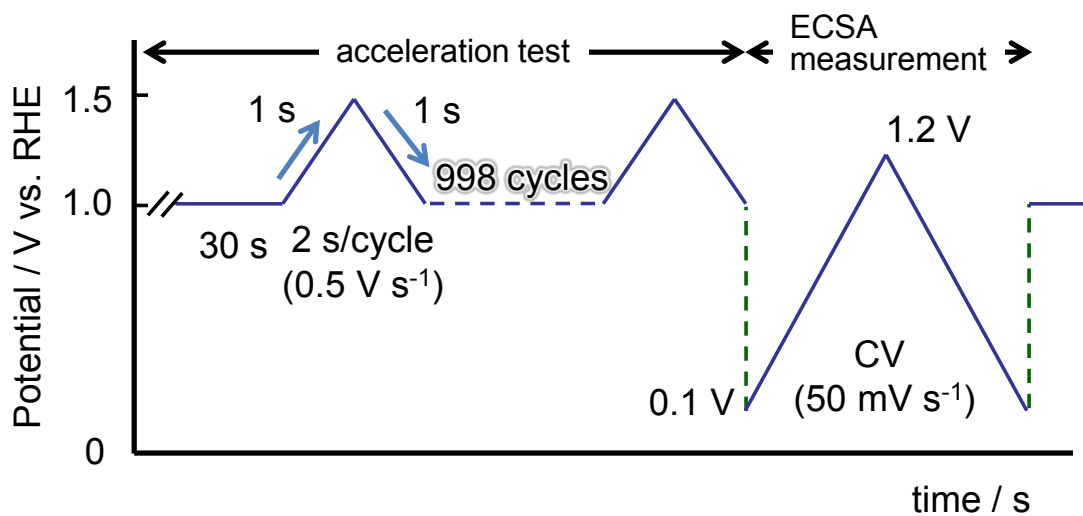

**Figure S8** | Protocol of durability test for a half-cell based on the Fuel Cell Commercialization Conference of Japan.
